# Supplementary material
Source: Research Square preprint supplement (doi:10.21203/rs.3.rs-9751723/v1)
Supplement: Supplementary file 1 [file 86549dc71efeec17d62e132b.docx]

**Appendix A**

**Survey Questionnaire**

**Main Survey (Model-Based Constructs)**

**Scale:**
1 = Strongly Disagree (SD)
2 = Disagree (D)
3 = Neutral (N)
4 = Agree (A)
5 = Strongly Agree (SA)

**1. Statistical Equivalence (SE)**

| **Code** | **Item** | **SD** | **D** | **N** | **A** | **SA** |
| --- | --- | --- | --- | --- | --- | --- |
| SE1 | Different exam versions are equal in overall difficulty | ☐ | ☐ | ☐ | ☐ | ☐ |
| SE2 | The scoring system ensures fairness across different test forms | ☐ | ☐ | ☐ | ☐ | ☐ |
| SE3 | All students are evaluated on an equivalent standard | ☐ | ☐ | ☐ | ☐ | ☐ |
| SE4 | Differences in questions do not affect the fairness of results | ☐ | ☐ | ☐ | ☐ | ☐ |

**2. System Transparency (ST)**

| **Code** | **Item** | **SD** | **D** | **N** | **A** | **SA** |
| --- | --- | --- | --- | --- | --- | --- |
| ST1 | The exam system clearly explains how questions are selected | ☐ | ☐ | ☐ | ☐ | ☐ |
| ST2 | I understand how my exam is generated | ☐ | ☐ | ☐ | ☐ | ☐ |
| ST3 | The process of scoring is clearly communicated | ☐ | ☐ | ☐ | ☐ | ☐ |
| ST4 | The system provides enough information about how it works | ☐ | ☐ | ☐ | ☐ | ☐ |

**3. Algorithmic Opacity (AO)**

| **Code** | **Item** | **SD** | **D** | **N** | **A** | **SA** |
| --- | --- | --- | --- | --- | --- | --- |
| AO1 | It is difficult to understand how the system selects questions | ☐ | ☐ | ☐ | ☐ | ☐ |
| AO2 | The exam system feels like a “black box” | ☐ | ☐ | ☐ | ☐ | ☐ |
| AO3 | I do not know how my final score is calculated | ☐ | ☐ | ☐ | ☐ | ☐ |
| AO4 | The system lacks clarity in its decision-making process | ☐ | ☐ | ☐ | ☐ | ☐ |

**4. Item Bank Exposure (IBE)**

| **Code** | **Item** | **SD** | **D** | **N** | **A** | **SA** |
| --- | --- | --- | --- | --- | --- | --- |
| IBE1 | I have prior experience with item-bank-based exams | ☐ | ☐ | ☐ | ☐ | ☐ |
| IBE2 | I am familiar with exams that use large question banks | ☐ | ☐ | ☐ | ☐ | ☐ |
| IBE3 | I understand how item banks are used in assessments | ☐ | ☐ | ☐ | ☐ | ☐ |
| IBE4 | My previous experience helps me understand computerized exams | ☐ | ☐ | ☐ | ☐ | ☐ |

**5. Perceived Fairness (PF)**

| **Code** | **Item** | **SD** | **D** | **N** | **A** | **SA** |
| --- | --- | --- | --- | --- | --- | --- |
| PF1 | The computerized exam system is fair to all students | ☐ | ☐ | ☐ | ☐ | ☐ |
| PF2 | I believe the exam process treats students equally | ☐ | ☐ | ☐ | ☐ | ☐ |
| PF3 | I feel confident that the exam results are fair | ☐ | ☐ | ☐ | ☐ | ☐ |
| PF4 | The differences in exam questions do not create unfairness | ☐ | ☐ | ☐ | ☐ | ☐ |

**6. Trust in Assessment System (TR)**

| **Code** | **Item** | **SD** | **D** | **N** | **A** | **SA** |
| --- | --- | --- | --- | --- | --- | --- |
| TR1 | I trust the computerized exam system | ☐ | ☐ | ☐ | ☐ | ☐ |
| TR2 | I believe the system produces accurate results | ☐ | ☐ | ☐ | ☐ | ☐ |
| TR3 | I feel confident relying on the system’s evaluation | ☐ | ☐ | ☐ | ☐ | ☐ |
| TR4 | The system can be trusted to assess students fairly | ☐ | ☐ | ☐ | ☐ | ☐ |

**7. Algorithmic Legitimacy (AL)**

| **Code** | **Item** | **SD** | **D** | **N** | **A** | **SA** |
| --- | --- | --- | --- | --- | --- | --- |
| AL1 | The computerized exam system is appropriate for high-stakes testing | ☐ | ☐ | ☐ | ☐ | ☐ |
| AL2 | The system is a legitimate way to assess students | ☐ | ☐ | ☐ | ☐ | ☐ |
| AL3 | I accept the system as a valid method of evaluation | ☐ | ☐ | ☐ | ☐ | ☐ |
| AL4 | The system deserves to be used in official examinations | ☐ | ☐ | ☐ | ☐ | ☐ |

**8. Acceptance (ACC)**

| **Code** | **Item** | **SD** | **D** | **N** | **A** | **SA** |
| --- | --- | --- | --- | --- | --- | --- |
| ACC1 | I am willing to take future computerized exams | ☐ | ☐ | ☐ | ☐ | ☐ |
| ACC2 | I accept the results provided by the system | ☐ | ☐ | ☐ | ☐ | ☐ |
| ACC3 | I support the use of computerized exams in education | ☐ | ☐ | ☐ | ☐ | ☐ |
| ACC4 | I prefer computerized exams over traditional exams | ☐ | ☐ | ☐ | ☐ | ☐ |

**9. Explanation / Result Logic Clarity (EXP) — Moderator**

| **Code** | **Item** | **SD** | **D** | **N** | **A** | **SA** |
| --- | --- | --- | --- | --- | --- | --- |
| EXP1 | The system explains how scores are calculated | ☐ | ☐ | ☐ | ☐ | ☐ |
| EXP2 | I receive clear information about how my exam results are produced | ☐ | ☐ | ☐ | ☐ | ☐ |
| EXP3 | The explanation provided by the system improves my understanding | ☐ | ☐ | ☐ | ☐ | ☐ |
| EXP4 | The system clearly communicates how fairness is ensured | ☐ | ☐ | ☐ | ☐ | ☐ |
